# Supplementary material
Source: PubMed Central journal article supplement (PMC4011087)
Supplement: supp_141.10.2165_DEV105072.pdf [file supp_141.10.2165_DEV105072.pdf]

**A**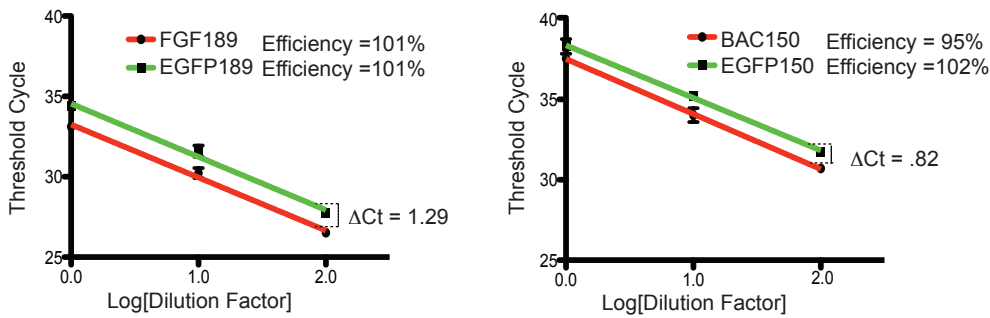**B**

*EGFP*, fin clip, 9 months, 15 of 15 Sequences Mutant

```

ATGGTGAGCAAGGGCGAGGAGCTGTTACCGGGGTGGTGCCCATCTGGTTCGAGCTGGACGGCGACGTAAACGGCCACAAGTTCAGCGTGAAA  EGFP  X 0

ATGGTGAGCAAGGGCGAGGAGCTGT-----AAA  (-65)  X 8
ATGGTGAGCAAGGGCGAGGAGCTGTTTAC-----GGACGGCGACGTAAACGGCCACAAGTTCAGCGTGAAA  (-27)
ATGGTGAGCAAGGGCGAGGAGCTGTTTAC-----TGGACGGCGACGTAAACGGCCACAAGTTCAGCGTGAAA  (-26)
ATGGTGAGCAAGGGCGAGGAGCTGTTTACCGGGGTGGTGCC-----GCTGGACGGCGACGTAAACGGCCACAAGTTCAGCGTGAAA  (-12)
ATGGTGAGCAAGGGCGAGGAGCTGTTTACCGGGGTGGTGCCCA-----GCTGGACGGCGACGTAAACGGCCACAAGTTCAGCGTGAAA  (-10)
ATGGTGAGCAAGGGCGAGGAGCTGTTTACCGGGGTGGTGCCCAT-----GCTGGACGGCGACGTAAACGGCCACAAGTTCAGCGTGAAA  (-9)
ATGGTGAGCAAGGGCGAGGAGCTGTTTACCGGGGTGGTGCCCAAC-----AGCTGGACGGCGACGTAAACGGCCACAAGTTCAGCGTGAAA  (+2, -9)
ATGGTGAGCAAGGGCGAGGAGCTGTTTACCGGGGTGGTGCCCATCTGGGGTGT-----GGACGGCGACGTAAACGGCCACAAGTTCAGCGTGAAA  (+5, -7)

```

*EGFP*, fin clip, 9 months, 18 of 18 Sequences Mutant

```

ATGGTGAGCAAGGGCGAGGAGCTGTTTACCGGGGTGGTGCCCATCTGGTTCGAGCTGGACGGCGACGTAAACGGCCACAAGTTCAGCGTGAAA  EGFP  X 0

ATGGTGAGCAAGGGCGAGGAG-----TAAACGGCCACAAGTTCAGCGTGAAA  (-46)
ATGGTGAGCAAGGGCGAGGAGGCTG-----AAACGGCCACAAGTTCAGCGTGAAA  (-43)  X 2
ATGGTGAGCAAGGGCGAGGAGCTGTTTAC-----TGGACGGCGACGTAAACGGCCACAAGTTCAGCGTGAAA  (-26)
ATGGTGAGCAAGGGCGAGGAGCTGTTTAC-----TCGAGCTGGACGGCGACGTAAACGGCCACAAGTTCAGCGTGAAA  (-22)
ATGGTGAGCAAGGGCGAGGAGCTGTTTAC-----GTCGAGCTGGACGGCGACGTAAACGGCCACAAGTTCAGCGTGAAA  (-19)  X 2
ATGGTGAGCAAGGGCGAGGAGCTGTTTACCGGGGTGGTGCCCATCTGGT-----GACGTAAACGGCCACAAGTTCAGCGTGAAA  (-13)
ATGGTGAGCAAGGGCGAGGAGCTGTTTACCGGGGTGGTGCCCAT-----GACGGCGACGTAAACGGCCACAAGTTCAGCGTGAAA  (-13)  X 3
ATGGTGAGCAAGGGCGAGGAGCTGTTTACCGGGGTGGTGCCCA-----GCTGGACGGCGACGTAAACGGCCACAAGTTCAGCGTGAAA  (-10)  X 7

```

**C**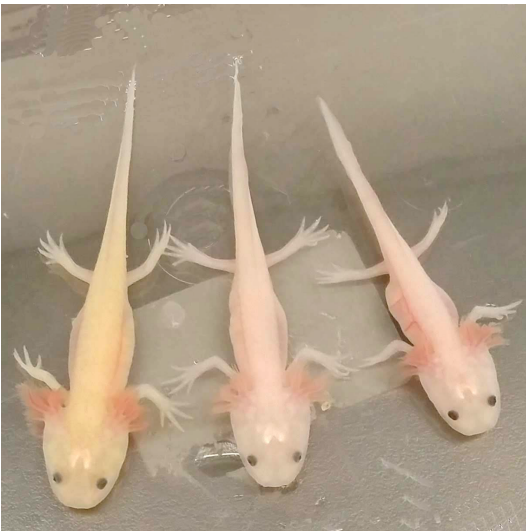

**Supplementary Figure 1.** (A). Two standard curves created from Real-Time PCR of EGFP transgene and size-matched control genomic DNA sequences from Tg(CAGG:EGFP) transgenic animal indicate that this line contains a single copy of the transgene. Under amplification conditions of near 100% efficiency, signal from EGFP reaches the threshold (Ct) one cycle behind sized-match control regions. (B) Sequencing of PCR products from animals depicted in Figure 1D and 1E reveal multiple indel events at targeted site in EGFP transgene. (C) At 9 months, animals depicted in Figure 1D and E (middle and right, respectively) next to an uninjected EGFP-positive (left) sibling.



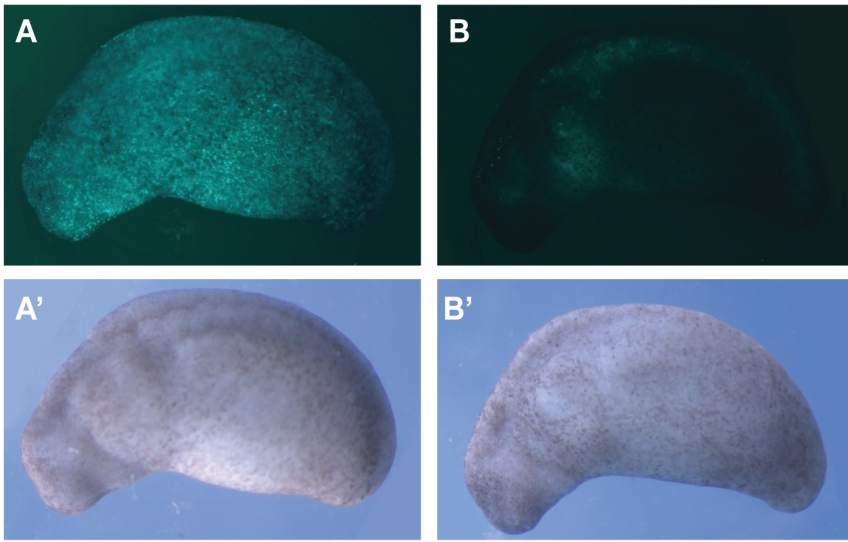

**Supplementary Figure 3.** At 5 days post fertilization, variability in RGN-induced mutagenesis, corresponds to variability in expression of coinjected *nls-EGFP* mRNA. Embryos coinjected with *nls-EGFP* and *bambi*-directed RGN display uniform expression of EGFP (A), others display very low-level mosaic EGFP expression (B).
